# Supplementary material for: Multiple Organ System Defects and Transcriptional Dysregulation in the Nipbl +/− Mouse, a Model of Cornelia de Lange Syndrome
Source: PubMed Central journal article supplement (PMC2730539; doi:10.1371/journal.pgen.1000650), 2009-09-18
Supplement: pgen.1000650.s008.pdf [file pgen.1000650.s008.pdf]

| Gene Symbol                                                                     | Probeset     | Description                                                                                              | Q Value | mutant mean (log2) | SD   | wildtype mean (log2) | SD   | Relative expression (mutant/wildtype) | Gene location             |
|---------------------------------------------------------------------------------|--------------|----------------------------------------------------------------------------------------------------------|---------|--------------------|------|----------------------|------|---------------------------------------|---------------------------|
| <b>Regulators of G-protein signaling (no known intervening genes)</b>           |              |                                                                                                          |         |                    |      |                      |      |                                       |                           |
| <i>Rgs5</i>                                                                     | 1420942_s_at | regulator of G-protein signaling 5                                                                       | 0.014   | 6.91               | 0.13 | 7.31                 | 0.35 | 0.76                                  | 1:171,585,632-171,625,944 |
| <i>Rgs4</i>                                                                     | 1416286_at   | regulator of G-protein signaling 4                                                                       | 0.009   | 7.61               | 0.16 | 7.84                 | 0.15 | 0.85                                  | 1:171,671,807-171,677,773 |
| <b>Potassium channel subunits (no known intervening genes)</b>                  |              |                                                                                                          |         |                    |      |                      |      |                                       |                           |
| <i>Kctd3</i>                                                                    | 1459353_at   | potassium channel tetramerisation domain containing 3                                                    | 0.040   | 7.22               | 0.08 | 7.01                 | 0.24 | 1.16                                  | 1:190,794,977-190,831,719 |
| <i>Kcnk2</i>                                                                    | 1449158_at   | potassium channel, subfamily K, member 2                                                                 | 0.005   | 8.63               | 0.22 | 8.88                 | 0.07 | 0.84                                  | 1:191,031,810-191,167,711 |
| <b>alpha 2,6-Sialyltransferases (no known intervening genes)</b>                |              |                                                                                                          |         |                    |      |                      |      |                                       |                           |
| <i>St6galnac5</i>                                                               | 1419420_at   | alpha-N-acetyl-neuraminyl-2,3-beta-galactosyl-1,3)-N-acetylgalactosaminide alpha-2,6-sialyltransferase 5 | 0.027   | 8.00               | 0.22 | 8.27                 | 0.26 | 0.83                                  | 3:152,482,850-152,645,174 |
| <i>St6galnac3</i>                                                               | 1457125_at   | alpha-N-acetyl-neuraminyl-2,3-beta-galactosyl-1,3)-N-acetylgalactosaminide alpha-2,6-sialyltransferase 3 | 0.040   | 5.48               | 0.15 | 5.65                 | 0.16 | 0.89                                  | 3:152,865,473-153,388,026 |
| <b>C1q complement components (no known intervening genes)</b>                   |              |                                                                                                          |         |                    |      |                      |      |                                       |                           |
| <i>C1qb</i>                                                                     | 1417063_at   | complement component 1, q subcomponent, beta polypeptide                                                 | 0.005   | 7.26               | 0.21 | 7.67                 | 0.17 | 0.75                                  | 4:136,436,048-136,442,028 |
| <i>C1qc</i>                                                                     | 1449401_at   | complement component 1, q subcomponent, C chain                                                          | 0.005   | 6.71               | 0.23 | 7.07                 | 0.17 | 0.78                                  | 4:136,445,724-136,448,808 |
| <i>C1qa</i>                                                                     | 1417381_at   | complement component 1, q subcomponent, alpha polypeptide                                                | 0.018   | 7.09               | 0.20 | 7.29                 | 0.13 | 0.87                                  | 4:136,451,833-136,454,684 |
| <b>Type 3 Semaphorins (one intervening gene [<i>Speer3</i>], not expressed)</b> |              |                                                                                                          |         |                    |      |                      |      |                                       |                           |
| <i>Sema3a</i>                                                                   | 1420416_at   | semaphorin 3A                                                                                            | 0.014   | 8.08               | 0.10 | 8.27                 | 0.13 | 0.88                                  | 5:13,396,784-13,602,559   |
| <i>Sema3e</i>                                                                   | 1442226_at   | semaphorin 3E                                                                                            | 0.036   | 5.74               | 0.29 | 6.04                 | 0.13 | 0.81                                  | 5:14,025,276-14,256,688   |
| <b>Gaba receptor subunits (one intervening gene, not probed)</b>                |              |                                                                                                          |         |                    |      |                      |      |                                       |                           |
| <i>Gabra2</i>                                                                   | 1455444_at   | gamma-aminobutyric acid (GABA-A) receptor, subunit alpha 2                                               | 0.014   | 6.20               | 0.32 | 6.55                 | 0.18 | 0.78                                  | 5:71,352,296-71,487,088   |
| <i>Gabra4</i>                                                                   | 1433707_at   | gamma-aminobutyric acid (GABA-A) receptor, subunit alpha 4                                               | 0.005   | 6.26               | 0.34 | 6.64                 | 0.22 | 0.77                                  | 5:71,960,973-72,049,547   |
| <i>Gabbr1</i>                                                                   | 1419719_at   | gamma-aminobutyric acid (GABA-A) receptor, subunit beta 1                                                | 0.032   | 6.29               | 0.19 | 6.50                 | 0.15 | 0.87                                  | 5:72,091,255-72,528,467   |

|                                                                                                                                          |              |                                     |       |       |      |       |      |      |                           |
|------------------------------------------------------------------------------------------------------------------------------------------|--------------|-------------------------------------|-------|-------|------|-------|------|------|---------------------------|
| <b>Beta globin locus (set of four genes, no known intervening genes)</b>                                                                 |              |                                     |       |       |      |       |      |      |                           |
| <i>Hbb-b1</i> ///                                                                                                                        |              | hemoglobin, beta adult major, minor |       |       |      |       |      |      |                           |
| <i>Hbb-b2</i>                                                                                                                            | 1417184_s_at | chains                              | 0.005 | 13.18 | 0.20 | 13.43 | 0.09 | 0.84 | 7:110,961,038-110,962,510 |
| <i>Hbb-b2</i>                                                                                                                            | 1427866_x_at | hemoglobin, beta adult minor chain  | 0.014 | 5.39  | 0.27 | 5.85  | 0.30 | 0.74 | 7:110,975,048-110,976,610 |
|                                                                                                                                          |              | hemoglobin Z, beta-like embryonic   |       |       |      |       |      |      |                           |
| <i>Hbb-bh1</i>                                                                                                                           | 1437990_x_at | chain                               | 0.005 | 7.15  | 0.31 | 8.49  | 0.51 | 0.39 | 7:110,990,150-110,991,678 |
|                                                                                                                                          |              | hemoglobin Y, beta-like embryonic   |       |       |      |       |      |      |                           |
| <i>Hbb-y</i>                                                                                                                             | 1436717_x_at | chain                               | 0.097 | 13.55 | 0.08 | 13.61 | 0.07 | 0.95 | 7:111,000,272-111,001,721 |
| <b>Type VI collagen chains (no known intervening genes)</b>                                                                              |              |                                     |       |       |      |       |      |      |                           |
| <i>Col6a2</i>                                                                                                                            | 1452250_a_at | collagen, type VI, alpha 2          | 0.018 | 8.17  | 0.39 | 8.59  | 0.30 | 0.75 | 10:76,058,507-76,086,072  |
| <i>Col6a1</i>                                                                                                                            | 1448590_at   | collagen, type VI, alpha 1          | 0.014 | 7.22  | 0.46 | 7.70  | 0.32 | 0.72 | 10:76,171,537-76,188,789  |
| <b>Small leucine-rich repeat proteoglycans (set of four genes; one [<i>Kera</i>] not probed; <i>Epyc</i> levels close to background)</b> |              |                                     |       |       |      |       |      |      |                           |
| <i>Dcn</i>                                                                                                                               | 1449368_at   | decorin                             | 0.036 | 8.92  | 0.54 | 9.34  | 0.29 | 0.75 | 10:96,942,245-96,980,777  |
| <i>Lum</i>                                                                                                                               | 1423607_at   | lumican                             | 0.027 | 9.11  | 0.58 | 9.72  | 0.38 | 0.65 | 10:97,028,437-97,035,337  |
| <i>Epyc</i>                                                                                                                              | 1421114_a_at | epiphycan                           | 0.384 | 4.99  | 0.25 | 5.14  | 0.48 | 0.90 | 10:97,106,702-97,144,534  |
| <b>Alpha globin locus (set of three genes, one [<i>Hbq</i>] not probed)</b>                                                              |              |                                     |       |       |      |       |      |      |                           |
|                                                                                                                                          |              | hemoglobin X, alpha-like embryonic  |       |       |      |       |      |      |                           |
| <i>Hba-x</i>                                                                                                                             | 1448716_at   | chain                               | 0.005 | 11.00 | 0.22 | 11.35 | 0.21 | 0.78 | 11:32,176,602-32,178,113  |
| <i>Hba-a1</i> ///                                                                                                                        |              |                                     |       |       |      |       |      |      |                           |
| <i>Hba-a2</i>                                                                                                                            | 1452757_s_at | hemoglobin alpha, adult chain       | 0.005 | 13.55 | 0.10 | 13.69 | 0.07 | 0.91 | 11:32,183,678-32,184,486  |
| <b>Gap junction proteins (set of three genes, one [<i>Gja3</i>] not probed)</b>                                                          |              |                                     |       |       |      |       |      |      |                           |
| <i>Gjb2</i>                                                                                                                              | 1423271_at   | gap junction protein, beta 2        | 0.014 | 6.99  | 0.44 | 7.42  | 0.22 | 0.74 | 14:57,717,451-57,723,539  |
| <i>Gjb6</i>                                                                                                                              | 1448397_at   | gap junction protein, beta 6        | 0.005 | 6.04  | 0.40 | 6.72  | 0.27 | 0.63 | 14:57,742,141-57,752,103  |
| <b>Protocadherins (two intervening genes, not probed)</b>                                                                                |              |                                     |       |       |      |       |      |      |                           |
| <i>Pcdh8</i>                                                                                                                             | 1447825_x_at | protocadherin 8                     | 0.027 | 10.11 | 0.13 | 10.27 | 0.11 | 0.90 | 14:80,166,592-80,171,107  |
| <i>Pcdh17</i>                                                                                                                            | 1436920_at   | protocadherin 17                    | 0.040 | 7.55  | 0.57 | 8.27  | 0.61 | 0.61 | 14:84,843,370-84,936,867  |
| <b>Protocadherin beta cluster (see Figure 8)</b>                                                                                         |              |                                     |       |       |      |       |      |      |                           |
| <b>Sorcs family receptors (no known intervening genes)</b>                                                                               |              |                                     |       |       |      |       |      |      |                           |
|                                                                                                                                          |              | sortilin-related VPS10 domain       |       |       |      |       |      |      |                           |
| <i>Sorcs3</i>                                                                                                                            | 1425111_at   | containing receptor 3               | 0.005 | 6.81  | 0.23 | 7.05  | 0.11 | 0.84 | 19:48,280,515-48,879,995  |
|                                                                                                                                          |              | VPS10 domain receptor protein       |       |       |      |       |      |      |                           |
| <i>Sorcs1</i>                                                                                                                            | 1425864_a_at | SORCS 1                             | 0.005 | 6.23  | 0.10 | 6.46  | 0.12 | 0.85 | 19:50,218,430-50,752,975  |
